# Supplementary material for: The p38 SAPK Is Recruited to Chromatin via Its Interaction with Transcription Factors
Source: PubMed Central journal article supplement — J Biol Chem. 2010 Aug 3;285(41):31819–28. doi: 10.1074/jbc.M110.155846 (PMC2951253; doi:10.1074/jbc.m110.155846), 2010-08-03
Supplement: supp_M110.155846_jbc.M110.155846-1.pdf [file supp_M110.155846_jbc.M110.155846-1.pdf]

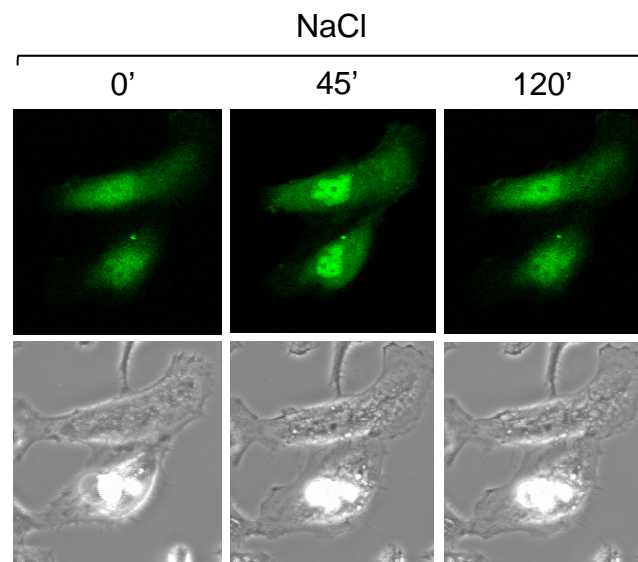

Supplementary Data S1. HeLa cells were transfected with p38-GFP SAPK and treated with 100 mM NaCl for the indicated times. p38-GFP SAPK cellular localization after the addition of 100 mM NaCl was monitored by *in vivo* confocal microscopy.

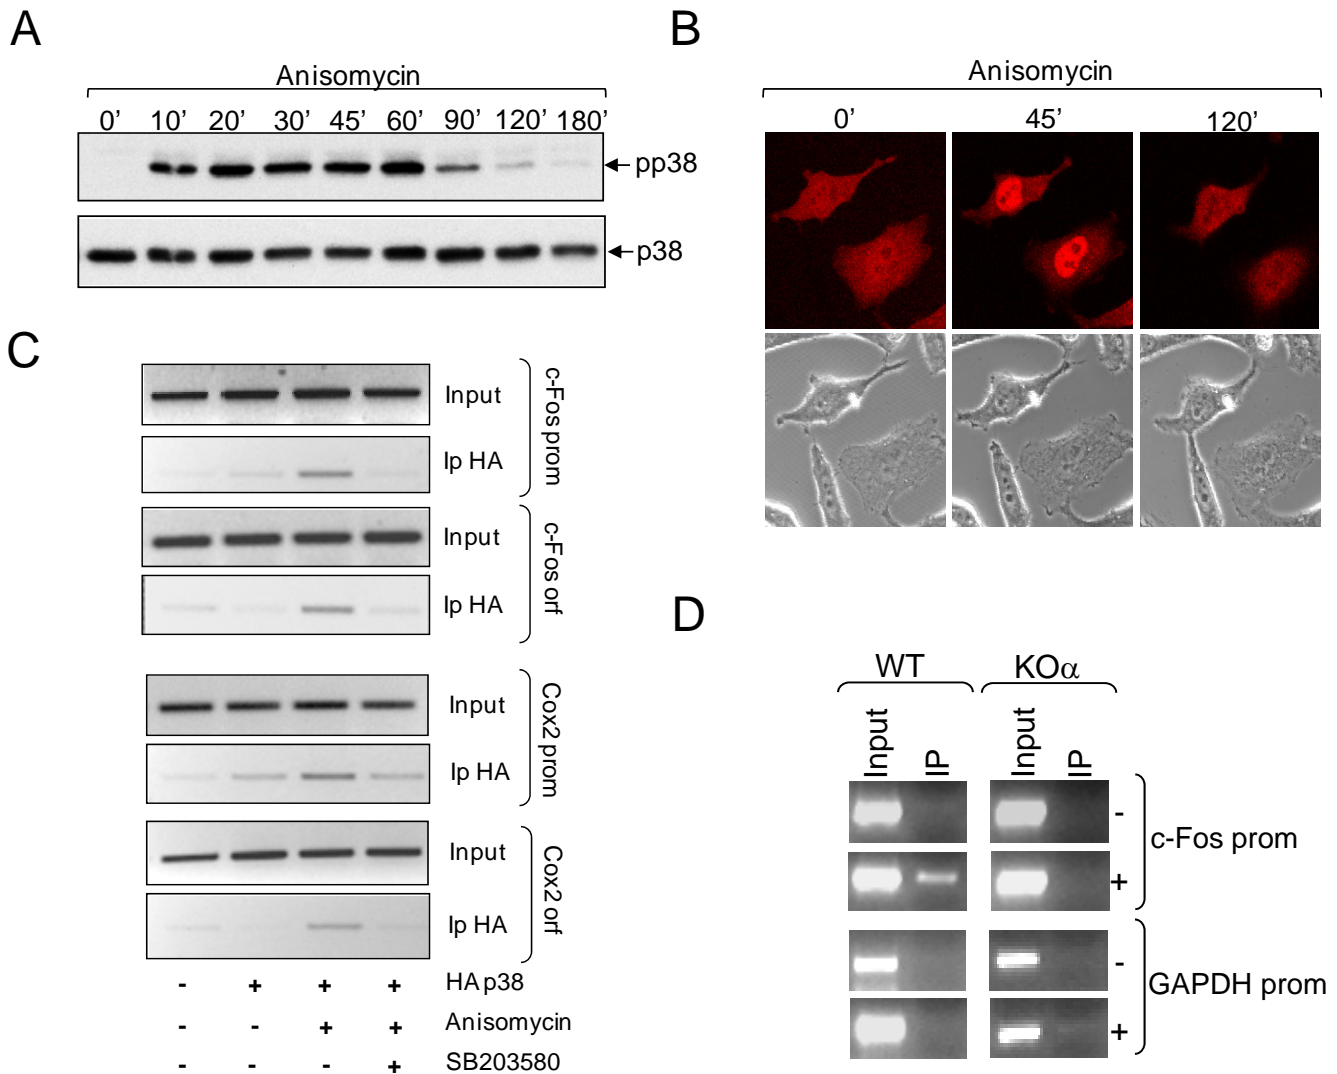

Supplementary Data S2. *A*, HeLa cells were stimulated with 25 ng/ml of anisomycin for the indicated times and analyzed by western blotting with the indicated antibodies. *B*, HeLa cells were transfected with p38-DsRed SAPK and treated with 25 ng/ml of anisomycin for the indicated times. p38-DsRed SAPK cellular localization was monitored by *in vivo* confocal microscopy. *C*, HeLa cells were transfected with pCDNA3-3HA-p38 $\alpha$  and treated with 25 ng/ml of anisomycin for 45 minutes either in the absence or presence of 10  $\mu$ M SB203580 and subjected to ChIP analysis using an anti-HA antibody. *D*, Wild type and p38 $\alpha$  SAPK knock out MEFs were treated with 25 ng/ml of anisomycin for 45 minutes and subjected to ChIP assay using an anti-p38 $\alpha$  antibody. DNA fragments were analyzed by PCR.

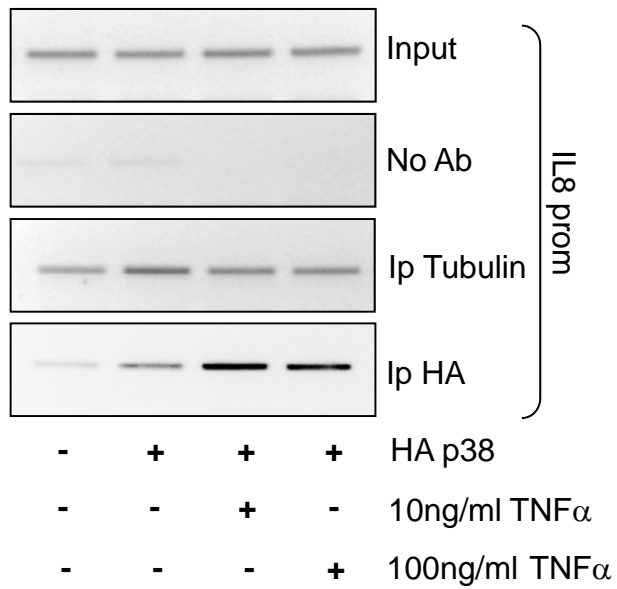

Supplementary Data S3. HeLa cells were transfected with pCDNA3-3HA-p38 $\alpha$ , stimulated with 10 ng/ml or 100 ng/ml for 60 minutes and subjected to ChIP analysis using an anti-HA an anti-tubulin antibody. Immunoprecipitated DNA fragments were analyzed by PCR.
